# Supplementary material
Source: MDPI journal article supplement (https://www.mdpi.com/2073-4433/15/3/277)
Supplement: s1 [file s1]

# **Improvement of Stable Atmospheric Boundary Simulation with High-Spatiotemporal-Resolution Nudging over the North China Plain**

Tingting Xu<sup>1,2,\*</sup>, Zhuohao Peng<sup>1</sup>, Yan Wang<sup>1</sup>, Chaoyue Wan<sup>1</sup>, Shenlan Liu<sup>1</sup>, , Shuqiao Jiang<sup>1</sup>, Xiaolu Tang<sup>1</sup>, Xilin Zhao<sup>1</sup>

<sup>1</sup> College of Ecology and Environment, Chengdu University of Technology, Chengdu, 610059 China

<sup>2</sup> College of Architecture and Environment, Sichuan University, Chengdu, 610065, China

\* Correspondence: xutingting19@cdut.edu.cn

$$MB = \frac{1}{N} \sum_{i=1}^N (sim - obs) \quad \text{Equation S1}$$

$$RMSE = \sqrt{\sum_{i=1}^N (sim - obs)^2 / N} \quad \text{Equation S2}$$

$$R = \frac{\frac{1}{N} \sum_{i=1}^N (sim_i - \overline{sim})(obs_i - \overline{obs})}{\sqrt{\frac{1}{N} \sum_{i=1}^N (sim_i - \overline{sim})^2} \sqrt{\frac{1}{N} \sum_{i=1}^N (obs_i - \overline{obs})^2}} \quad \text{Equation S3}$$

where N is the number of comparison samples, sim is the simulation value, and obs is the observation value.

Table S1. WRF model configuration options and settings.

| Domain settings               |                             |
|-------------------------------|-----------------------------|
| Center latitude and longitude | 37.1°N, 116.4°E             |
| D01 horizontal grid           | 50×50                       |
| D01 grid spacing              | 30km×30km                   |
| D02 horizontal grid           | 99×120                      |
| D02 grid spacing              | 10km×10km                   |
| Vertical levels               | 40                          |
| Projection                    | Lambert conformal conic     |
| Configuration options         |                             |
| Data assimilation             | High-resolution OBS-nudging |
| Longwave radiation            | RRTMG                       |
| Shortwave radiation           | RRTMG                       |
| Cumulus parameterization      | Grell–Deveny                |
| Land surface                  | Noah                        |
| Boundary layer                | Yonsei University           |
| Microphysics                  | Lin et al.                  |
| Photolysis                    | Fast-J                      |

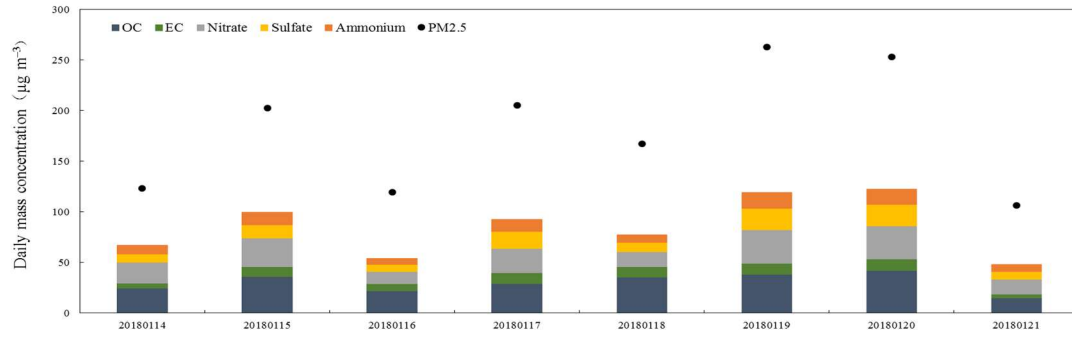

Figure S1. Daily concentration of PM<sub>2.5</sub> and its components at Pingyuan station from 14 to 21 January 2018.

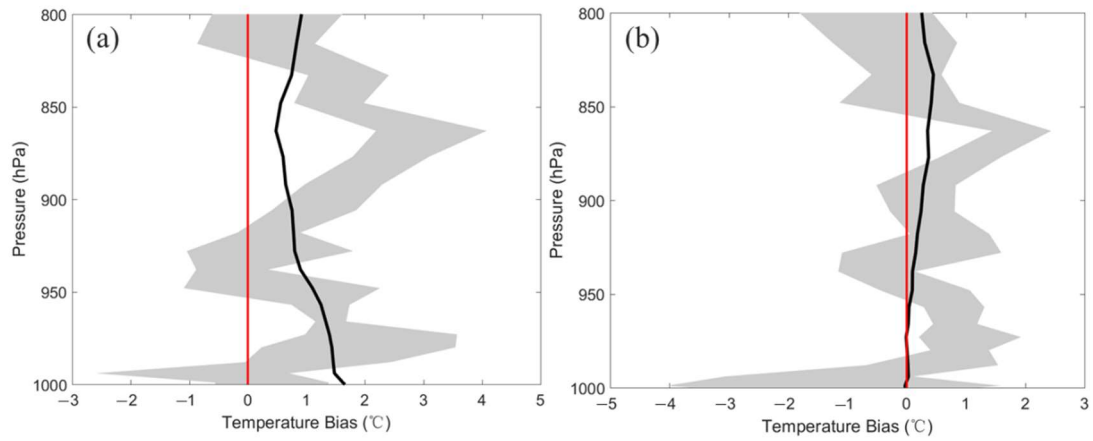

Figure S2. Temperature bias between WRF-BS (a) and WRF-OBS (b) and observed values during heavy pollution. The shaded part represents the difference of 25 and 75 quantiles.

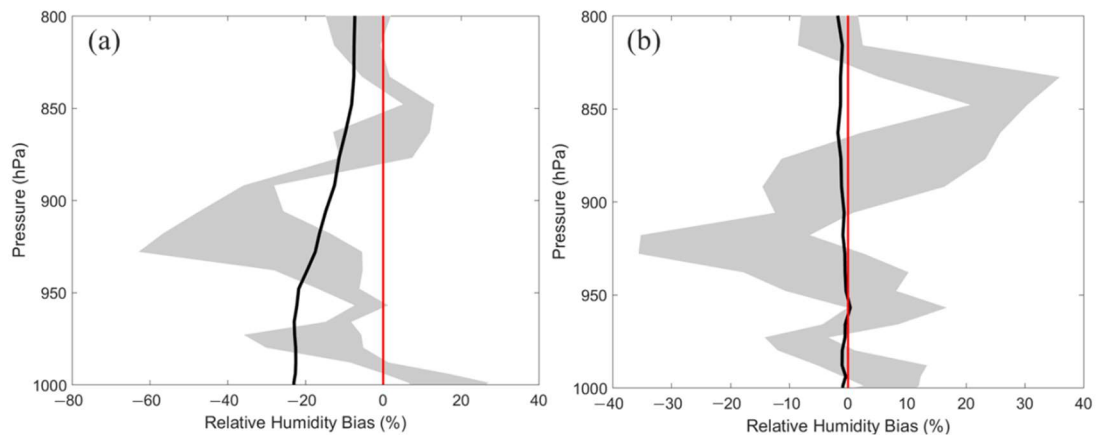

Figure S3. Relative humidity bias between WRF-BS (a) and WRF-OBS (b) and observed values during heavy pollution. The shaded part represents the difference of 25 and 75 quantiles.

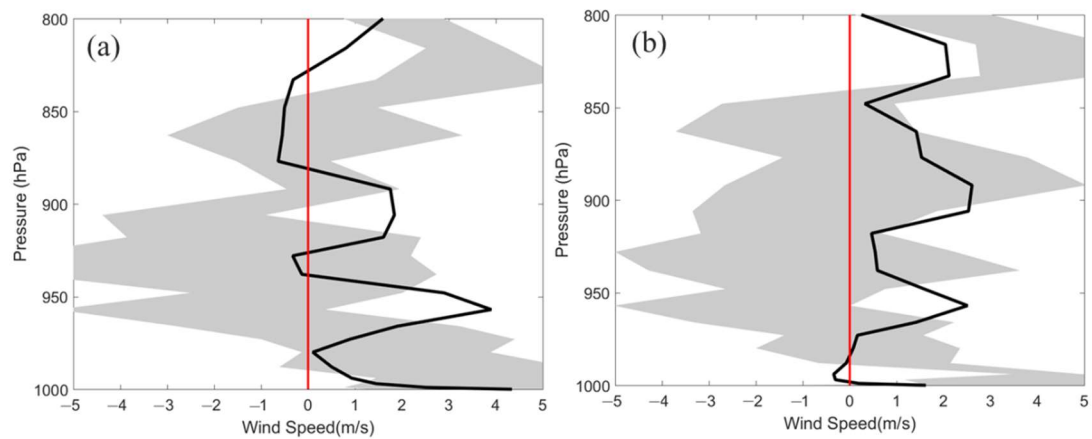

Figure S4. Wind speed bias between WRF-BS (a) and WRF-OBS (b) and observed values during heavy pollution. The shaded part represents the difference of 25 and 75 quantiles.

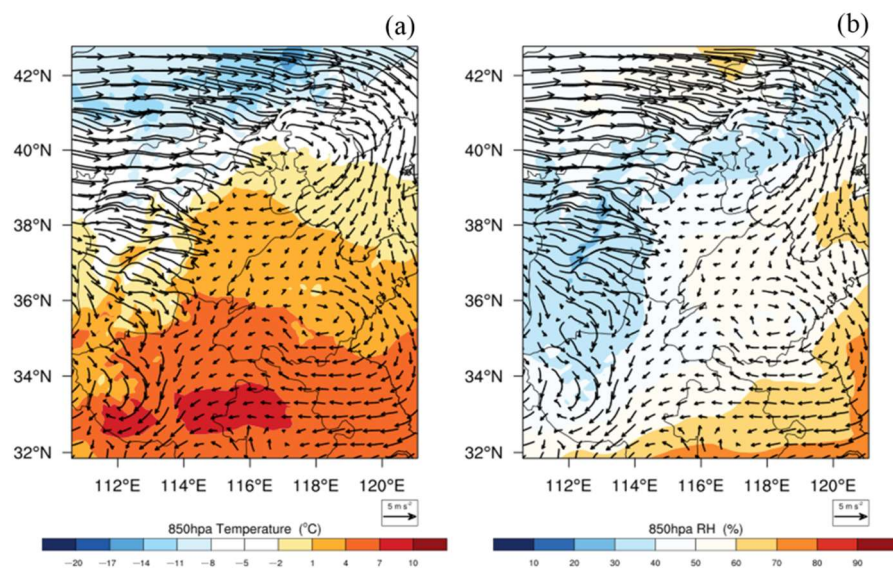

Figure S5. Spatial distributions of temperature (a), relative humidity (contour) and wind (black vectors) at 850 hPa during heavy polluted period.

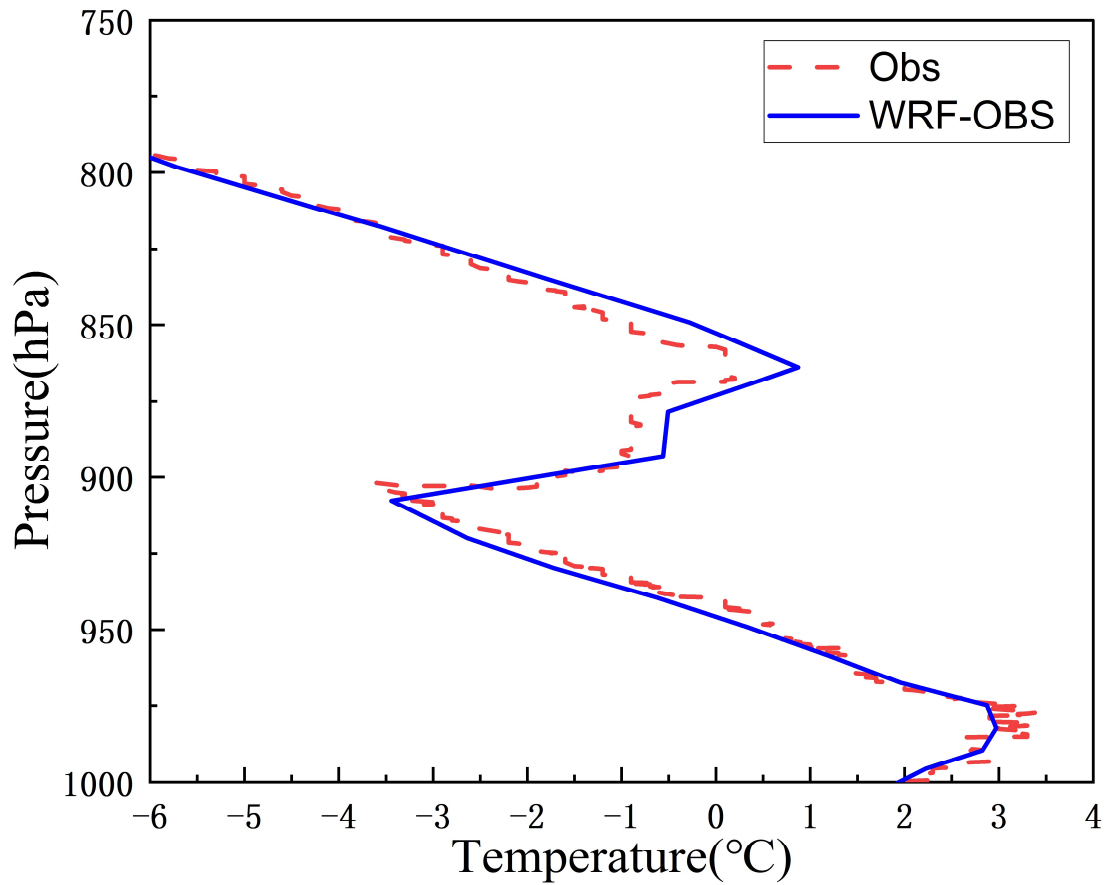

Figure S6. simulated and observed vertical temperature profile at 18:00 UTC in January 20, 2018 at Pingyuan station.

Table S2. List of abbreviations and corresponding full forms.

| Abbreviations | Full name                                                          |
|---------------|--------------------------------------------------------------------|
| SBL           | Stable boundary layer                                              |
| NCP           | North China Plain                                                  |
| WRF-OBS       | Weather Research and Forecasting with Observational Nudging Module |
| WRF-BS        | Unassimilated Weather Research and Forecasting model               |
| MOST          | Monin-Obukhov similarity theory                                    |
| WRF           | Weather Research and Forecasting                                   |

|                   |                                                                           |
|-------------------|---------------------------------------------------------------------------|
| WRF-Chem          | Weather Research and Forecasting with Chemistry                           |
| OBS-nudging       | Observational nudging                                                     |
| WRF-CMAQ          | Weather Research and Forecasting with Community Multiscale<br>Air Quality |
| PM <sub>2.5</sub> | Fine particulate matter                                                   |
| T2                | 2 m temperature                                                           |
| RH2               | 2 m relative humidity                                                     |
| WS10              | 10 m wind speed and direction                                             |
| BLH               | Boundary layer height                                                     |
| NCEP              | National Centers for Environmental Prediction                             |
| FNL               | Final Analysis                                                            |
| MB                | Mean bias                                                                 |
| ERA5              | European Center for Medium-Range Weather Forecasts<br>Reanalysis v5       |
| RMSE              | Root mean square error                                                    |
| R <sup>2</sup>    | Pearson correlation coefficient                                           |

---
